# Supplementary material for: Hierarchical structured α-Al2O3 supported S-promoted Fe catalysts for direct conversion of syngas to lower olefins
Source: Royal Society of Chemistry journal article supplement (doi:10.1039/c5cc00786k), 2015-01-01
Supplement: c5cc00786k1.pdf [file c5cc00786k1.pdf]

**Supporting Information**

**Hierarchical structured  $\alpha$ -Al<sub>2</sub>O<sub>3</sub> supported S-promoted Fe catalysts  
for direct conversion of syngas to lower olefins**

Xiangping Zhou,<sup>a</sup> Jian Ji,<sup>a</sup> Di Wang,<sup>a</sup> Xuezhi Duan,<sup>a,\*</sup> Gang Qian,<sup>a</sup> De Chen<sup>b</sup> and  
Xinggui Zhou<sup>a</sup>

*<sup>a</sup> State Key Laboratory of Chemical Engineering, East China University of Science  
and Technology, 130 Meilong Road, Shanghai 200237, China*

*<sup>b</sup> Department of Chemical Engineering, Norwegian University of Science and  
Technology, Trondheim 7491, Norway*

*\*Corresponding author: [xzduan@ecust.edu.cn](mailto:xzduan@ecust.edu.cn); Fax: +86-21-64253528.*

## 1. Catalyst preparation

Hierarchical structured boehmite was prepared by a two-step solvothermal method described earlier (*Chin. J. Inorg. Chem.* **2011**, 27: 251-258), and then calcined at 1300 °C (heating rate, 5 °C·min<sup>-1</sup>) for 4 h to obtain hierarchical structured  $\alpha$ -Al<sub>2</sub>O<sub>3</sub> (i.e.,  $\alpha$ -Al<sub>2</sub>O<sub>3</sub>-H). The  $\alpha$ -Al<sub>2</sub>O<sub>3</sub>-H and commercial  $\alpha$ -Al<sub>2</sub>O<sub>3</sub> ( $\alpha$ -Al<sub>2</sub>O<sub>3</sub>-C, Nuoda Chemical Co. Ltd., China) were used to support iron species without S promoter using ammonium iron citrate (J.T. Baker, 14.5-16.0 wt% Fe) by incipient wetness impregnation method. The two impregnated samples were dried at ambient temperature for 12 h and then at 120 °C for 12 h and calcined at 500 °C for 2 h. The as-obtained two samples were denoted as Fe/ $\alpha$ -Al<sub>2</sub>O<sub>3</sub>-H and Fe/ $\alpha$ -Al<sub>2</sub>O<sub>3</sub>-C, respectively. Similarly, Fe/ $\alpha$ -Al<sub>2</sub>O<sub>3</sub>-H catalysts with different content of S promoter (Fe/ $\alpha$ -Al<sub>2</sub>O<sub>3</sub>-H-xS, x representing the nominal loading of S (10<sup>-2</sup> wt%)) were prepared using ammonium iron citrate and ferrous sulfate heptahydrate (Sinopharm Chemical Reagent Co. Ltd., China) precursors, where the amount of ferrous sulphate heptahydrate precursor is determined by the nominal S content. In addition, bulk  $\alpha$ -Fe<sub>2</sub>O<sub>3</sub> was obtained from the calcination of ammonium iron citrate at 500 °C for 2 h.

ICP results of two kinds of iron precursors and properties of iron catalysts with or without S promoter were listed in Table S1 and Table S2, respectively. As shown in Table S1, the S content in ammonium iron citrate precursor is very low, which can be ignored in our work. Because the S contents of our prepared S-promoted Fe catalysts are in the range of 0.03-0.08 wt%, the amount of ferrous sulfate precursor is much lower than that of ammonium iron citrate precursor. Therefore, different Fe-based

catalysts contain comparable Na contents, and thus the effects of S concentration are apparent in the current work.

## **2. Characterization**

The microstructures and elemental analysis of supports were characterized by field emission scanning electron microscopy (FESEM, FEI NOVA Nano SEM 450, Netherlands) fitted with an energy dispersive X-ray spectroscopy (EDS, EDAX). X-ray diffraction (XRD) was carried out using a Rigaku D/Max2550VB/PC X-ray diffractometer (Rigaku, Japan) with Cu K $\alpha$  radiation ( $\lambda=1.54056 \text{ \AA}$ ). The surface areas of  $\alpha$ -Al $_2$ O $_3$  supports were measured on ASAP 2020 (Micromeritics, USA) at 77 K after out-gassing the samples at 190 °C and 1 mmHg for 6 h. The elemental content of iron precursors were determined by inductively coupled plasma-atomic emission spectroscopy (ICP-AES, Agilent 725ES, USA). H $_2$  temperature-programmed reduction (H $_2$ -TPR) was performed using an Autochem 2920 (Micromeritics, USA) with 50 mg sample and 10% H $_2$ /Ar (30 mL·min $^{-1}$ ) as reducing gas. The temperature was increased from room temperature to 900 °C at a heating rate of 10 °C·min $^{-1}$ . The microstructures and elemental mappings of catalysts were characterized by high-resolution transmission electron microscopy (HRTEM, JEOL JEM-2100, Japan) fitted with an energy dispersive X-ray spectroscopy (EDS, Oxford-INCA). Thermal gravimetric-differential thermal analysis (TG-DTA) was conducted with a flow of air in the temperature range 30-800 °C (heating rate: 10 °C·min $^{-1}$ ) carried out on a TA SDT-Q600 thermobalance.

### 3. Catalytic testing

FTO reaction was carried out on a fixed-bed quartz reactor under 1 bar. Typically, 100 mg catalyst was first reduced in H<sub>2</sub> (15 mL·min<sup>-1</sup>) at 350 °C for 2 h (heating rate, 5 °C·min<sup>-1</sup>). After reduction, syngas (CO/H<sub>2</sub>=1/1 v/v, 15 mL·min<sup>-1</sup>) was introduced to the reactor. The outlet products were analyzed on-line using a gas chromatograph (GCA90, Echrom). A capillary column (MEGA-1) connected to a flame ionization detector (FID) was used to analyze hydrocarbons, while a packed column (Porapak Q) connected to a thermal conductivity detector (TCD) to analyze CO, CO<sub>2</sub> and H<sub>2</sub>. Calculation of CO conversion and product selectivity can refer to our recent work (*J. Mater. Chem. A* **2015**, 3: 4560-4567). In addition, the selectivity to oxygenates was below 1% and therefore excluded.

**Table S1** ICP results of two kinds of iron precursors.

| Iron precursor                | Content (wt%) |        |       |
|-------------------------------|---------------|--------|-------|
|                               | Fe            | S      | Na    |
| Ammonium iron citrate         | 15.0          | 0.0028 | 0.063 |
| Ferrous sulphate heptahydrate | 20.1          | 11.40  | 0.046 |

**Table S2** Elemental loading of iron catalysts with or without S promoter.

| Sample                                                          | Nominal loading (wt %) |      |        |
|-----------------------------------------------------------------|------------------------|------|--------|
|                                                                 | Fe                     | S    | Na     |
| Fe/ $\alpha$ -Al <sub>2</sub> O <sub>3</sub> -C <sup>a</sup>    | 10.0                   | ~0   | 0.042  |
| Fe/ $\alpha$ -Al <sub>2</sub> O <sub>3</sub> -H <sup>a</sup>    | 10.0                   | ~0   | 0.042  |
| Fe/ $\alpha$ -Al <sub>2</sub> O <sub>3</sub> -H-3S <sup>b</sup> | 10.0                   | 0.03 | ~0.042 |
| Fe/ $\alpha$ -Al <sub>2</sub> O <sub>3</sub> -H-5S <sup>b</sup> | 10.0                   | 0.05 | ~0.042 |
| Fe/ $\alpha$ -Al <sub>2</sub> O <sub>3</sub> -H-8S <sup>b</sup> | 10.0                   | 0.08 | ~0.042 |

<sup>a</sup> Using ammonium iron citrate precursor.

<sup>b</sup> Using ammonium iron citrate and ferrous sulfate precursors, and the amount of ferrous sulphate determined by the S content.

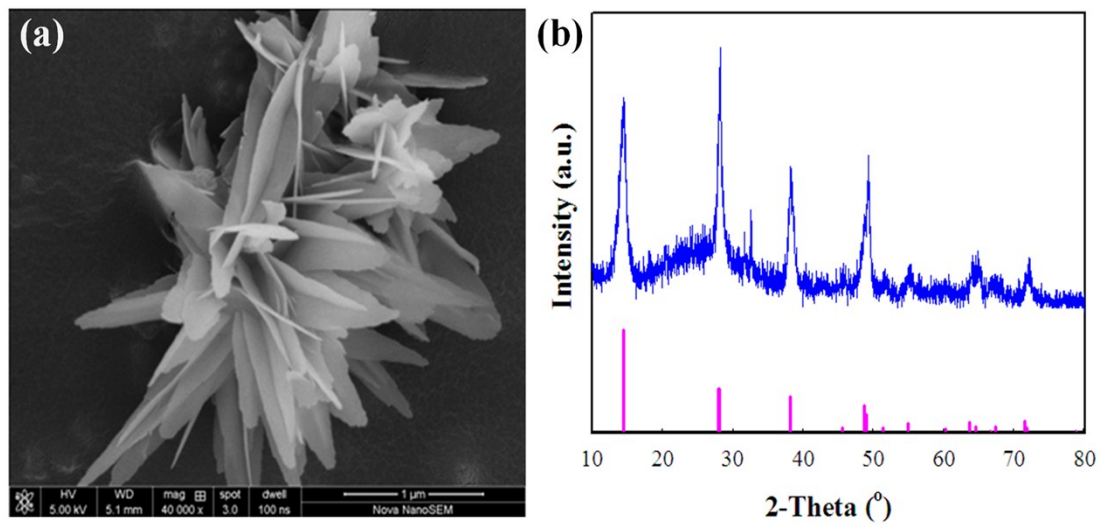

**Figure S1** Typical FESEM image (a) and XRD pattern (b) of hierarchical structured boehmite.

Standard pattern of boehmite (JCPDS No. 88-2112) was also presented for comparison.

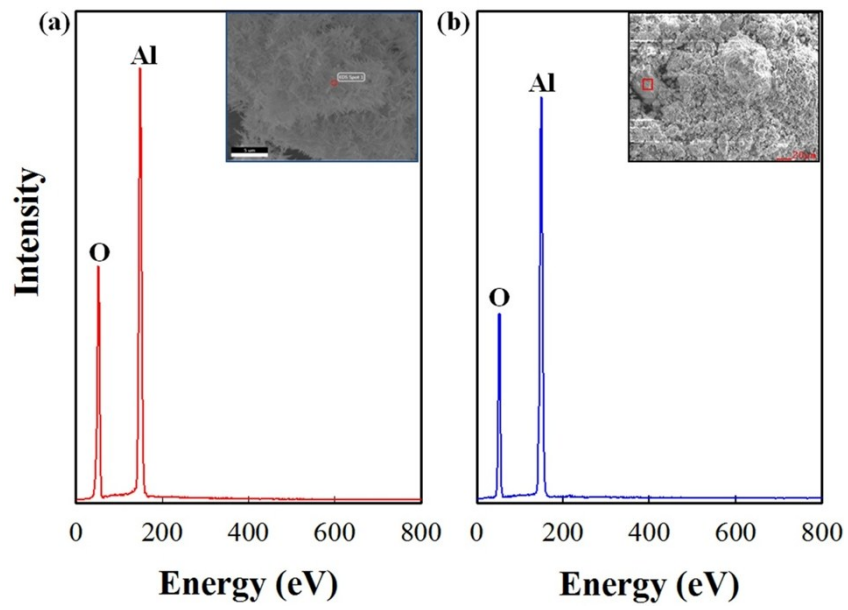

**Figure S2** EDS spectra and FESEM images of  $\alpha$ -Al<sub>2</sub>O<sub>3</sub>-H (a) and  $\alpha$ -Al<sub>2</sub>O<sub>3</sub>-C (b).



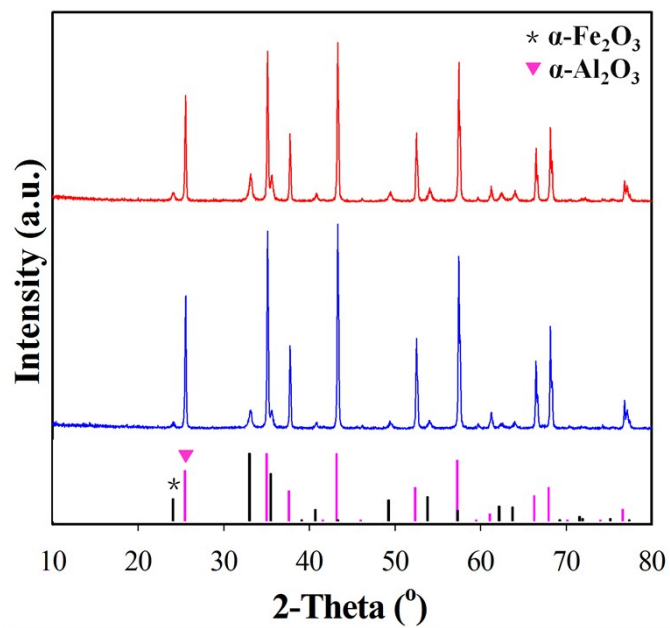

**Figure S3** XRD patterns of calcined Fe/α-Al<sub>2</sub>O<sub>3</sub>-H (red) and Fe/α-Al<sub>2</sub>O<sub>3</sub>-C (blue) samples. Standard patterns of α-Fe<sub>2</sub>O<sub>3</sub> (JCPDS No. 33-0664) and α-Al<sub>2</sub>O<sub>3</sub> (JCPDS No. 46-1212) were also presented for comparison.

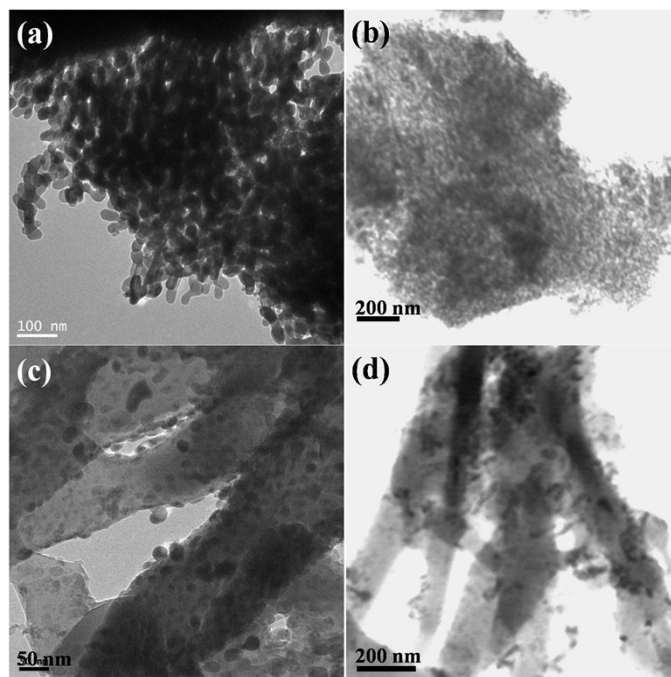

**Figure S4** Typical HRTEM images of calcined Fe/ $\alpha$ -Al<sub>2</sub>O<sub>3</sub>-C (a and b) and calcined Fe/ $\alpha$ -Al<sub>2</sub>O<sub>3</sub>-H (c and d).

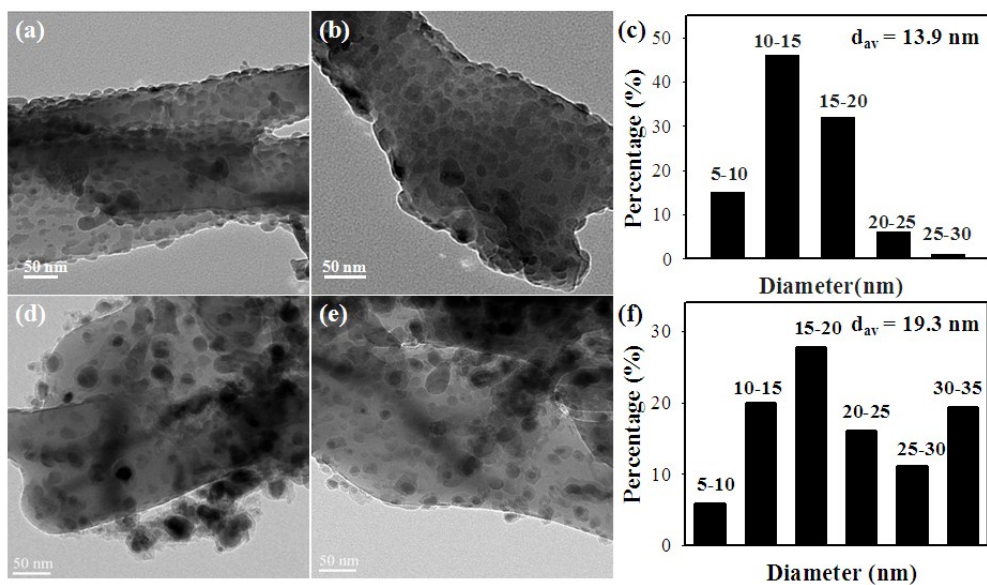

**Figure S5** Typical HRTEM images and corresponding particle size distributions of fresh (a, b and c) and used (d, e and f) Fe/ $\alpha$ -Al<sub>2</sub>O<sub>3</sub>-H catalysts. Reduction conditions: in H<sub>2</sub> (15 mL·min<sup>-1</sup>) at 350 °C for 2 h (heating rate, 5 °C·min<sup>-1</sup>). Reaction conditions: 350 °C, 1 bar, TOS=19 h and H<sub>2</sub>/CO=1 with a GHSV=9000 mL·h<sup>-1</sup>·g<sub>cat</sub><sup>-1</sup>.

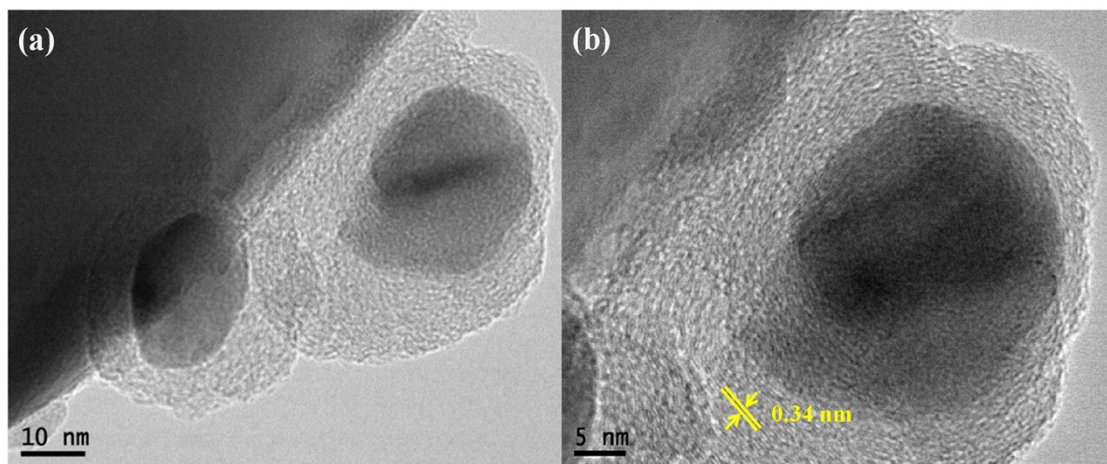

**Figure S6** Typical HRTEM images of used Fe/ $\alpha$ -Al<sub>2</sub>O<sub>3</sub>-H. Reaction conditions: 350 °C, 1 bar, TOS=19 h and H<sub>2</sub>/CO=1 with a GHSV=9000 mL·h<sup>-1</sup>·g<sub>cat</sub><sup>-1</sup>.

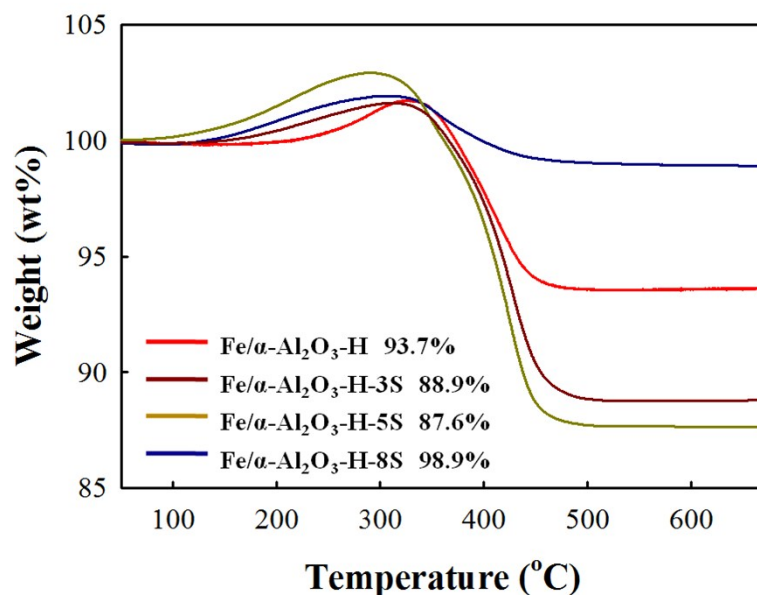

**Figure S7** TGA curves of the used catalysts. Reaction conditions: 350 °C, 1 bar, TOS=19 h and H<sub>2</sub>/CO=1 with a GHSV=9000 mL·h<sup>-1</sup>·g<sub>cat</sub><sup>-1</sup>.

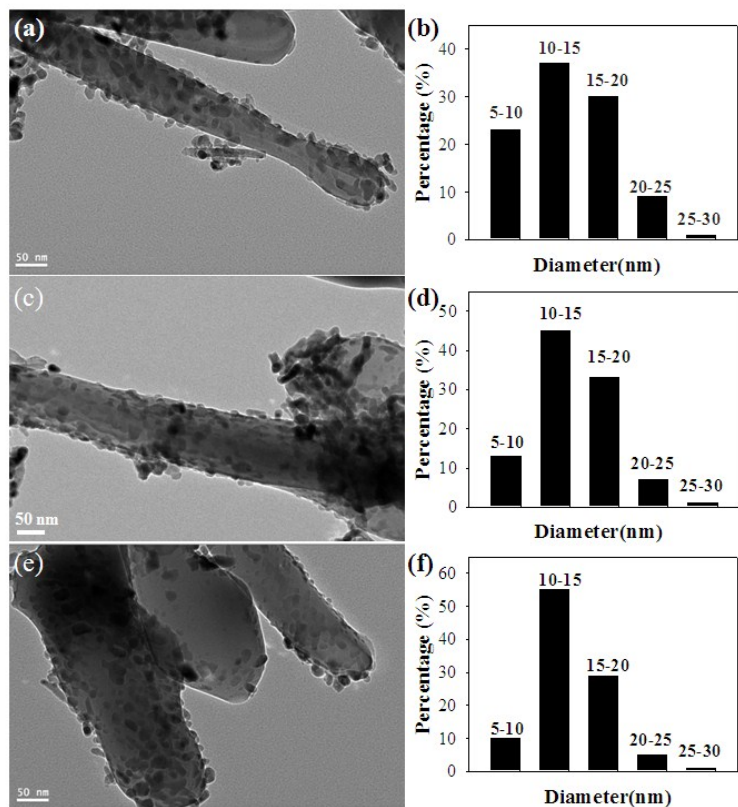

**Figure S8** Typical HRTEM images and corresponding particle size distributions of fresh Fe/α-Al<sub>2</sub>O<sub>3</sub>-H-3S (a and b), Fe/α-Al<sub>2</sub>O<sub>3</sub>-H-5S (c and d) and Fe/α-Al<sub>2</sub>O<sub>3</sub>-H-8S (e and f) catalysts. Reduction conditions: in H<sub>2</sub> (15 mL·min<sup>-1</sup>) at 350 °C for 2 h (heating rate, 5 °C·min<sup>-1</sup>). The mean iron particles sizes on the three fresh catalysts are 14.0, 14.1 and 13.9 nm, respectively.

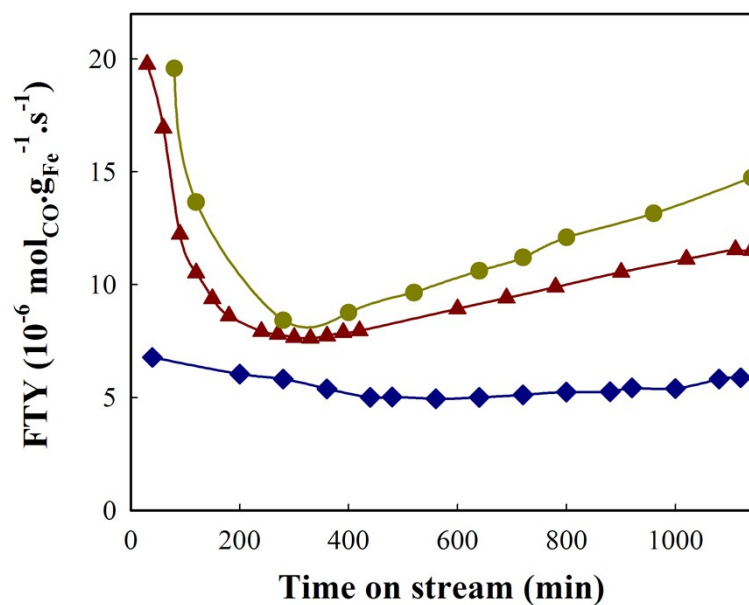

**Figure S9** FTY as a function of time on stream over Fe/ $\alpha$ -Al<sub>2</sub>O<sub>3</sub>-H-3S (▲), Fe/ $\alpha$ -Al<sub>2</sub>O<sub>3</sub>-H-5S (●) and Fe/ $\alpha$ -Al<sub>2</sub>O<sub>3</sub>-H-8S (◆) catalysts. The reaction was performed at 350 °C, 1 bar and H<sub>2</sub>/CO=1 with a GHSV=9000 mL·h<sup>-1</sup>·g<sub>cat</sub><sup>-1</sup>.
